# Supplementary material for: Synthesis of porous carbon from cotton using an Mg(OH)2 template for form-stabilized phase change materials with high encapsulation capacity, transition enthalpy and reliability
Source: Royal Society of Chemistry journal article supplement (doi:10.1039/c8ta01672k), 2018-01-01
Supplement: c8ta01672k1.pdf [file c8ta01672k1.pdf]

## Supplementary information

### **Synthesis of porous carbon from cotton using Mg(OH)<sub>2</sub> template for form-stabilized phase change materials with high encapsulation capacity, transition enthalpy and reliability**

Dimberu G. Atinafu<sup>a</sup>, Wenjun Dong<sup>\*a</sup>, Chen Wang<sup>a</sup> and Ge Wang<sup>\*a</sup>

<sup>a</sup>Beijing Key Laboratory of Function Materials for Molecule & Structure Construction, School of Materials Science and Engineering, University of Science and Technology Beijing, Beijing 100083, PR China.

\*Corresponding Authors: E-mail: wdong@ustb.edu.cn. (W. Dong) and gewang@mater.ustb.edu.cn (G. Wang); Tel: +86-10-62333765

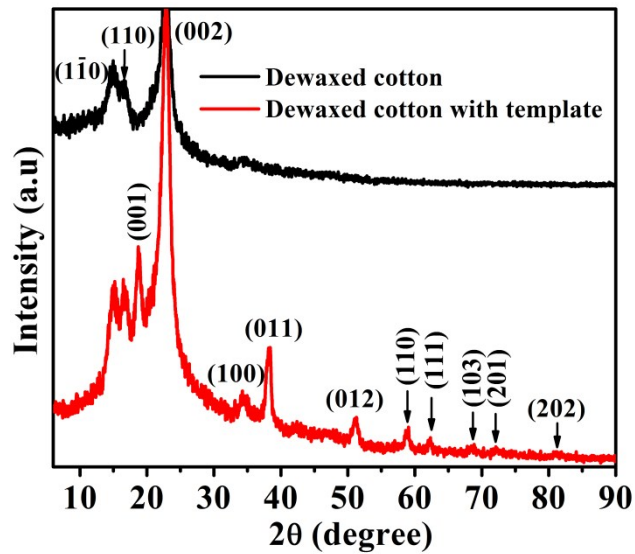

Fig. S1. XRD patterns of dewaxed cotton with and without template before carbonization.

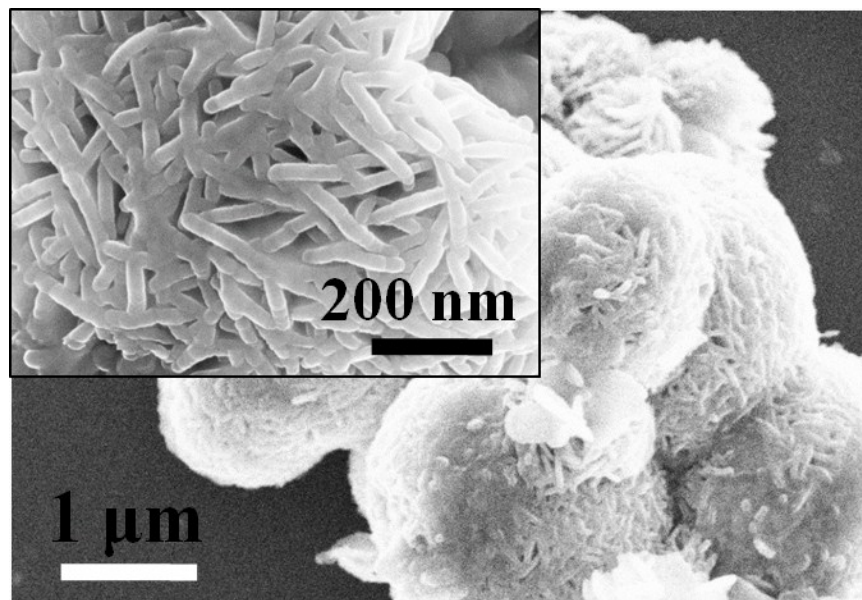

Fig. S2. SEM image of carbon prepared without template at 800 °C.

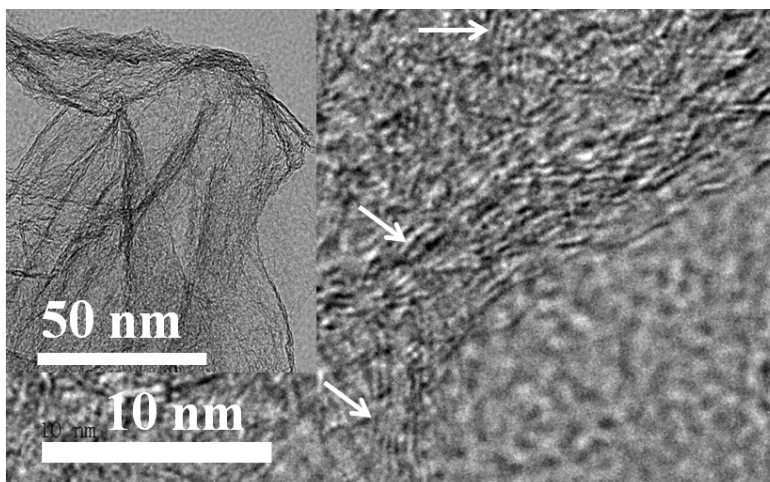

Fig. S3 High-resolution TEM image of PC12. Inset shows the TEM image with different magnification.

Table S3. Textural characteristics of as-prepared carbon materials.

| Samples | BET surface area (m <sup>2</sup> /g) |          |       |                    | Pore volume (cm <sup>3</sup> /g) |          |       |
|---------|--------------------------------------|----------|-------|--------------------|----------------------------------|----------|-------|
|         | Micropore                            | Mesopore | Total | Ratio <sup>a</sup> | Micropore                        | Mesopore | Total |
| PC7     | 229.2                                | 258.7    | 487.9 | 0.53               | 0.14                             | 1.08     | 1.22  |
| PC8     | 419.0                                | 298.7    | 717.7 | 0.42               | 0.18                             | 1.40     | 1.58  |
| PC9     | 571.8                                | 304.8    | 876.6 | 0.34               | 0.30                             | 1.53     | 1.83  |
| PC12    | 301.5                                | 286.2    | 587.7 | 0.48               | 0.16                             | 1.24     | 1.40  |

<sup>a</sup>Ratio of mesopore area to total area.

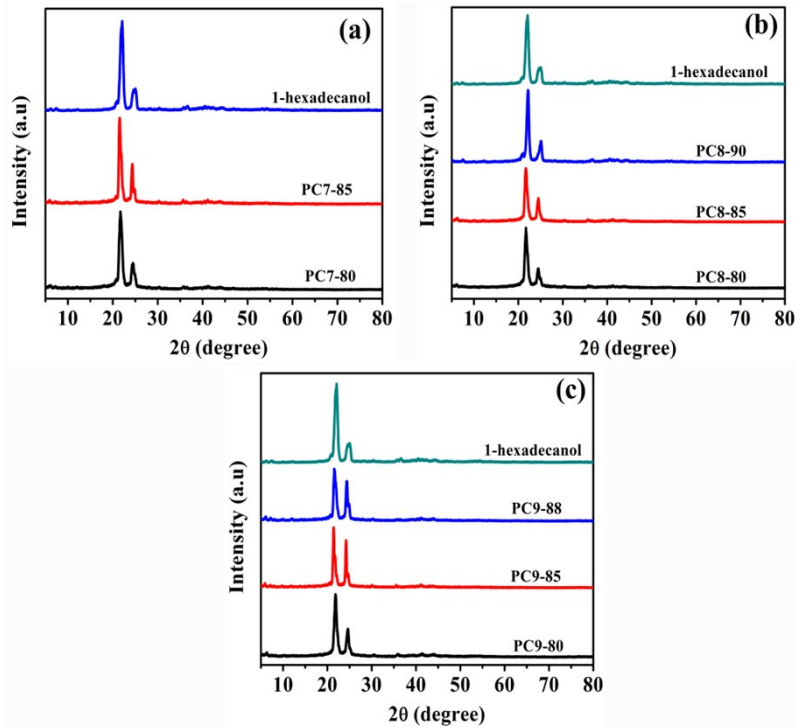

Fig. S4 XRD patterns of pristine PCM and as-prepared composite PCM with different wt% of PCM.

Table S2. Thermal properties of pure PCM and as-synthesized form-stabilized composite PCMs.

| Samples | $T_m$ (°C) | $\Delta H_m$ (kJ/kg) | $\Delta H_m^{exp}$ (kJ/kg) | $T_c$ (°C) |         | $\Delta H_c$ (kJ/kg) |
|---------|------------|----------------------|----------------------------|------------|---------|----------------------|
|         |            |                      |                            | $\alpha$   | $\beta$ |                      |
| PCM     | 51.4       | 222.8                | 222.8                      | 40.4       | 34.9    | 210.3                |
| Pc7-80  | 49.3       | 168.9                | 178.2                      | 41.2       | 34      | 160.6                |
| Pc7-85  | 50.4       | 204.4                | 189.4                      | 40.6       | 33.6    | 194.2                |
| Pc8-80  | 49.3       | 177.1                | 178.2                      | 41.1       | 33.3    | 167.9                |
| PC8-85  | 50.3       | 214.5                | 189.4                      | 40.7       | 33.2    | 194.9                |
| Pc8-90  | 50.8       | 219.4                | 200.5                      | 40.4       | 33.2    | 204.6                |
| Pc9-80  | 49.8       | 191.0                | 178.2                      | 41.1       | 33.9    | 178.2                |
| Pc9-85  | 50.6       | 198.8                | 189.4                      | 40.2       | 33.3    | 186.6                |
| PC9-88  | 51.2       | 215.5                | 196.1                      | 40.2       | 33.2    | 196.0                |

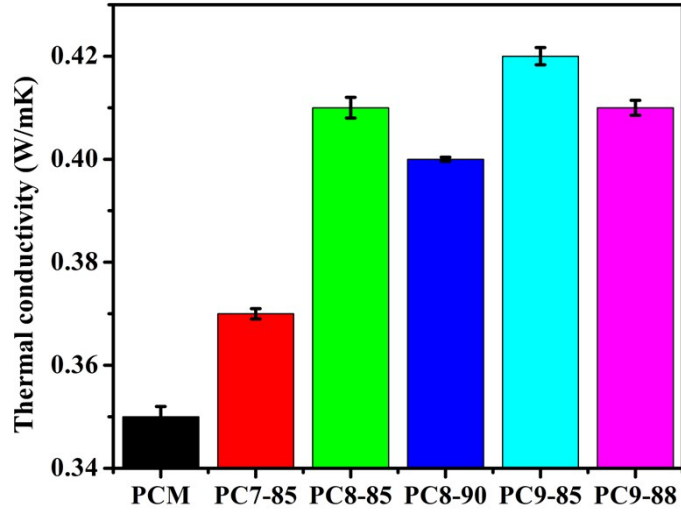

Fig. S5. Thermal conductivity of pure PCM and as-prepared composite PCMs.

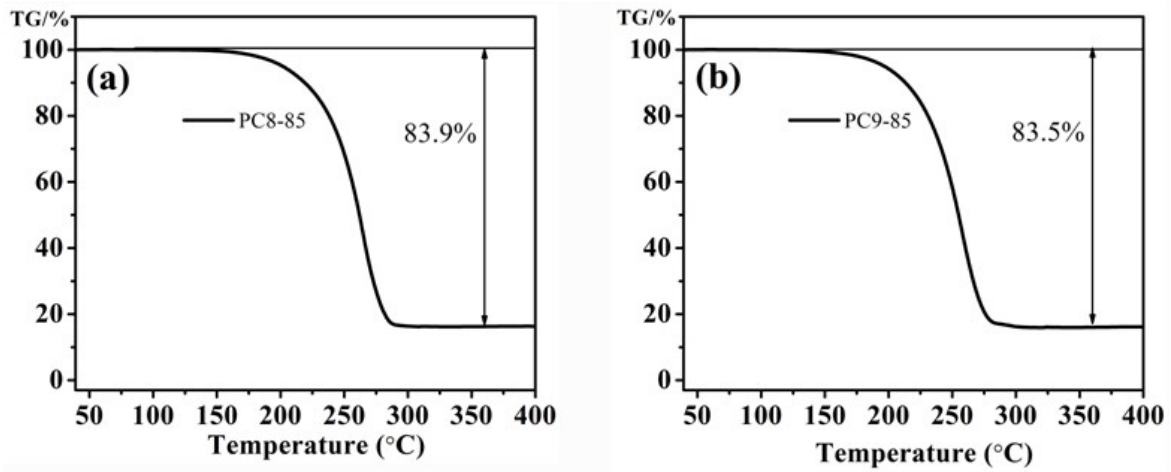

Fig. S6. TG analysis thermograms of as-prepared composite PCMs with 85 wt% of PCM loading.
